# Supplementary material for: New sesquiterpenoids from the rhizomes of Acorus tatarinowii
Source: Royal Society of Chemistry journal article supplement (doi:10.1039/c4ra06481j), 2014-08-20
Supplement: c4ra06481j1.pdf [file c4ra06481j1.pdf]

## **New sesquiterpenoids from the rhizomes of *Acorus tatarinowii***

Xiao-Lin Feng,<sup>a</sup> Yang Yu,<sup>\*a</sup> Hao Gao,<sup>a</sup> Zhen-Qiang Mu,<sup>a</sup> Xiao-Rui Cheng,<sup>b</sup> Wen-Xia Zhou,<sup>b</sup> and Xin-Sheng Yao<sup>\*a</sup>

<sup>a</sup> *Institute of Traditional Chinese Medicine & Natural Products, College of Pharmacy, Jinan University, Guangzhou 510632, P. R. China. E-mail: tyaoxs@gmail.com; 1018yuyang@163.com; Tel (Fax): +86-20-85221559.*

<sup>b</sup> *Beijing Institute of Pharmacology and Toxicology, Tai Ping Road 27, Beijing 100850, P. R. China.*

### List of Supporting Information

|                                                                          |           |
|--------------------------------------------------------------------------|-----------|
| <b>1 AChE and BACE1 activity assays</b> .....                            | <b>1</b>  |
| <b>2 The 1D and 2D NMR spectra of 4-epi-2-hydroxyacorenone (1)</b> ..... | <b>3</b>  |
| <b>3 The 1D and 2D NMR spectra of 4-epi-2-acetoxyacorenone (2)</b> ..... | <b>6</b>  |
| <b>4 The 1D and 2D NMR spectra of acotatarone A (3)</b> .....            | <b>9</b>  |
| <b>5 The 1D and 2D NMR spectra of acotatarone B (4)</b> .....            | <b>12</b> |
| <b>6 The 1D and 2D NMR spectra of tatarinowin C (5)</b> .....            | <b>16</b> |
| <b>7 The 1D and 2D NMR spectra of acotatarone C (6)</b> .....            | <b>19</b> |

## **1 AChE and BACE1 activity assays.**

### **1.1 Chemicals and reagents**

Lyophilized powder of acetylcholinesterase (AChE) from electric eel source, acetylthiocholine iodide (ATCh) and 5,5'-dithiobis [2-nitrobenzoic acid] (DTNB) were purchased from Sigma-Aldrich (USA). TruPoint™ beta-secretase assay kit<sup>384</sup> was obtained from PerkinElmer (USA). Recombinant human beta-secretase (BACE1) was purchased from Invitrogen (USA). DMSO was obtained from ACROS (USA). Huperzine A and VIa were synthesized by the Beijing institute of Pharmacology and Toxicology. 0.1M phosphate buffer (PB) with pH of 7.4 was used as a buffer throughout the AChE inhibitory assay.

### **1.2 *In Vitro* AChE Activity Assay**

The AChE activity was measured using a modified 96-well microplate assay based on Ellman's method.<sup>1</sup> The enzyme hydrolyses the substrate (ATCh) resulting in the formation of thiocholine which reacts with Ellman's reagent (DTNB) to produce 2-nitrobenzoate-5-mercaptothiocholine and 5-thio-2-nitrobenzoate which can be detected at 405 nm. The AChE stock solution (200 U/mL) was kept at -20°C. The further enzyme-dilution was done in deionized water. 0.7 mM DTNB and 3 mM ATCh were dissolved in the PB, respectively. The reaction mixture contained: 20 µL of 0.4 U/mL of AChE, 40 µL of test compound dissolved in PB (DMSO<1%, which was no influence on AChE activity) and 20 µL of ATCh, which incubated for 30 min at 37 °C. Then ice bath for 30 s, 10 µL of 1.0 N HCl was added to terminate reaction. After the addition of 120 µL of 0.7 mM DTNB, the absorbance was measured at 405 nm (EnSpire 2300, PerkinElmer) in 5 min.

Huperzine A was used as positive control, with IC<sub>50</sub> value of 22.6 nM. **1-12** did not show any significantly inhibition of AChE activity, even at the concentration  $1 \times 10^{-3}$  M.

### **1.3 *In Vitro* BACE1 Activity Assay**

The assay was carried out using a homogeneous time-resolved fluorescence technique and a TruPoint™ beta-secretase assay kit<sup>384</sup> according to the manufacturer's protocol. Briefly, the test compounds in DMSO and recombinant human beta-secretase (BACE1) were first incubated in a 384-well black OptiPlate™ for 30

min at 20-25°C. Then, the fluorescent Eu-CEVNLDAEFK-Qsy7 substrate was added to the wells and incubated for 6 h at 20-25°C, and the reaction was terminated by adding stop solution. Relative fluorescence units (RFU) at an excitation of 340 nm and an emission of 615 nm and kinetics were measured using a micro-plate reader Envision (PerkinElmer).

Vla was used as a positive control,<sup>2</sup> with IC<sub>50</sub> value of 2.5 nM. Most of the sesquiterpenoids did not show any percentage of fluorescence reduction, except that 4-epi-2-acetoxyacorenone (**2**) showed weak inhibitory rate (I %) at the concentration 1×10<sup>-3</sup>M (33.6 %).

#### 1.4 Statistics

All statistical analyses were performed using Graph Pad<sup>®</sup> 5.03 for Windows. Data are shown as means ± S.D. The percent inhibition of AChE activity was calculated as follows: I % =  $(E - S) / E \times 100\%$ , where *E* and *S* were the respective enzyme without and with the test sample, respectively. The percentage of inhibition of BACE1 activity was calculated using the following equation: I % =  $[1 - (S - B) / (N - B)] \times 100\%$ , where *N* is the activity of enzyme without test sample, *S* is the activity of enzyme with test sample and *B* is the background without enzyme and test sample. For the determination of IC<sub>50</sub> concentrations, the mean % inhibition dose-response curves were fitted to the dose-response-inhibition [log (inhibitor) vs. response-Variable slope (four parameters)]. The dose-response equation:  $Y = \text{Bottom} + (\text{Top} - \text{Bottom}) / [1 + 10(\log\text{IC}_{50} - X) \times \text{Hillslope}]$ , where *X* is the compound concentration, *Y* is the I %, top and bottom are the plateaus in the units of the y-axis, Hillslope describes the steepness of the family of curves.

#### Reference:

- [1] G. L. Ellman, K. D. Courtney, V. Andres, R. M. Feather-Stone, *Biochem. Pharmacol.* 1961, **7**, 88-95.
- [2] X. R. Cheng, Y. Zhou, W. Gu, J. Wu, A. H. Nie, J. P. Cheng, J. W. Zhou, W. X. Zhou, Y. X. Zhang, *Journal of Alzheimer's Disease*, 2013, **37**, 823-834.

## 2 The 1D and 2D NMR spectra of 4-epi-2-hydroxyacorenone (1)

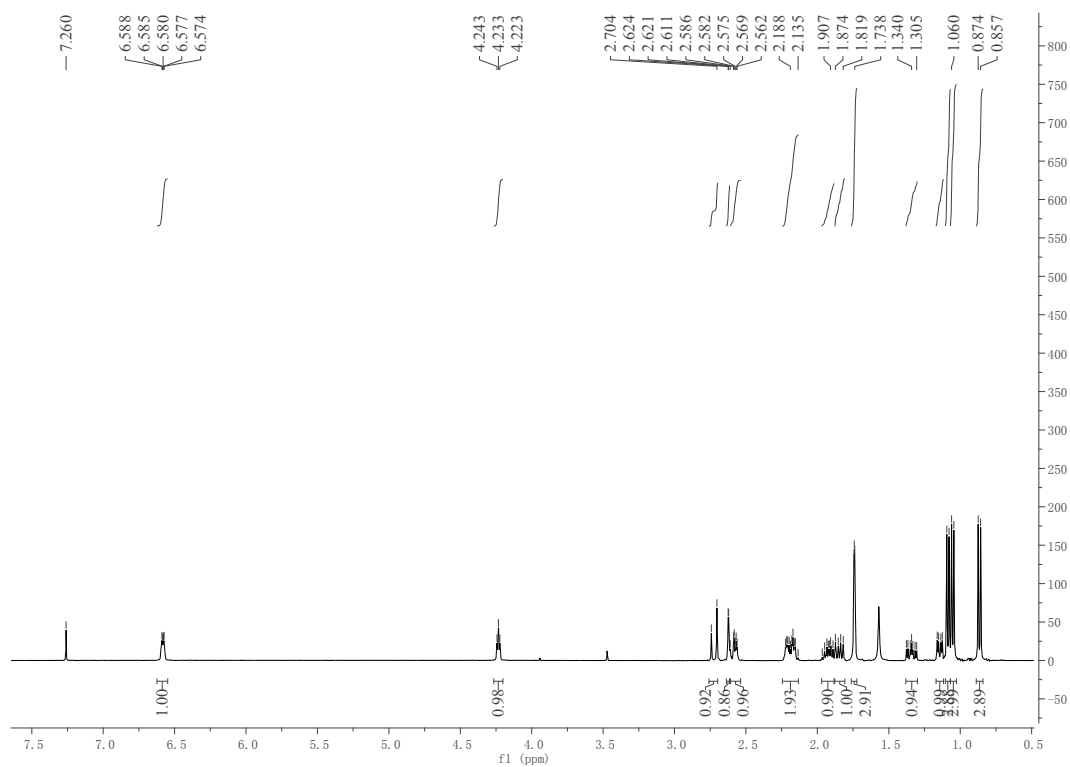

<sup>1</sup>H NMR spectrum for 4-epi-2-hydroxyacorenone (1) in CDCl<sub>3</sub>

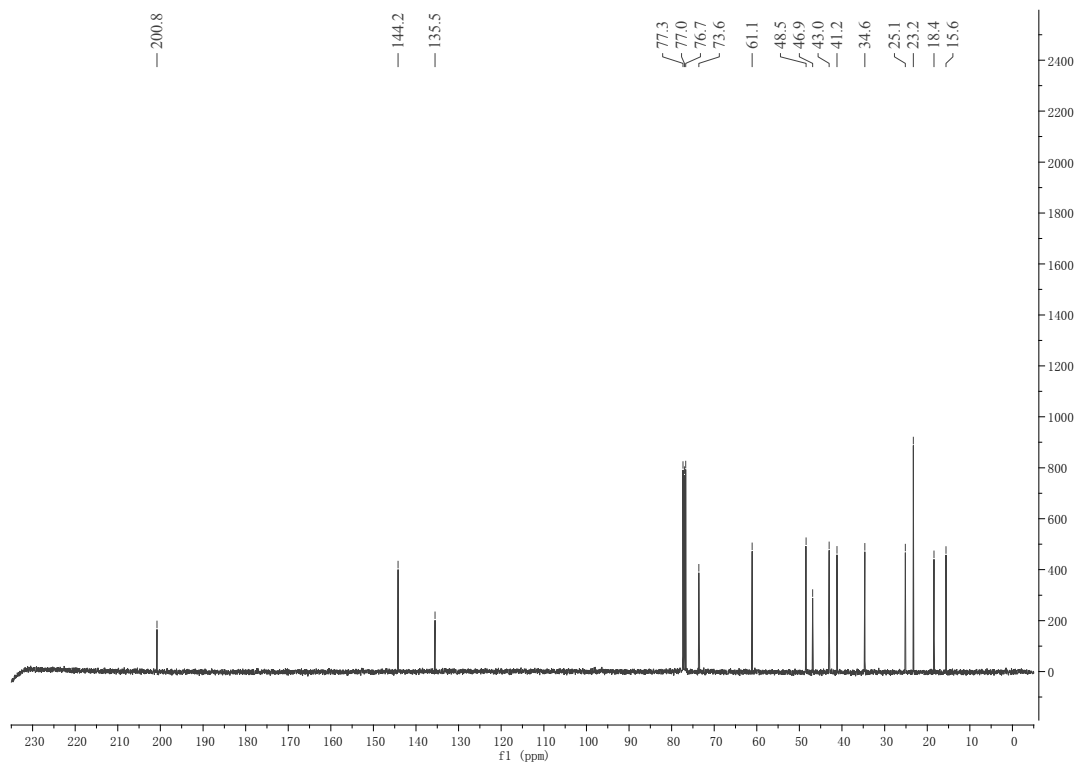

<sup>13</sup>C NMR spectrum for 4-epi-2-hydroxyacorenone (1) in CDCl<sub>3</sub>

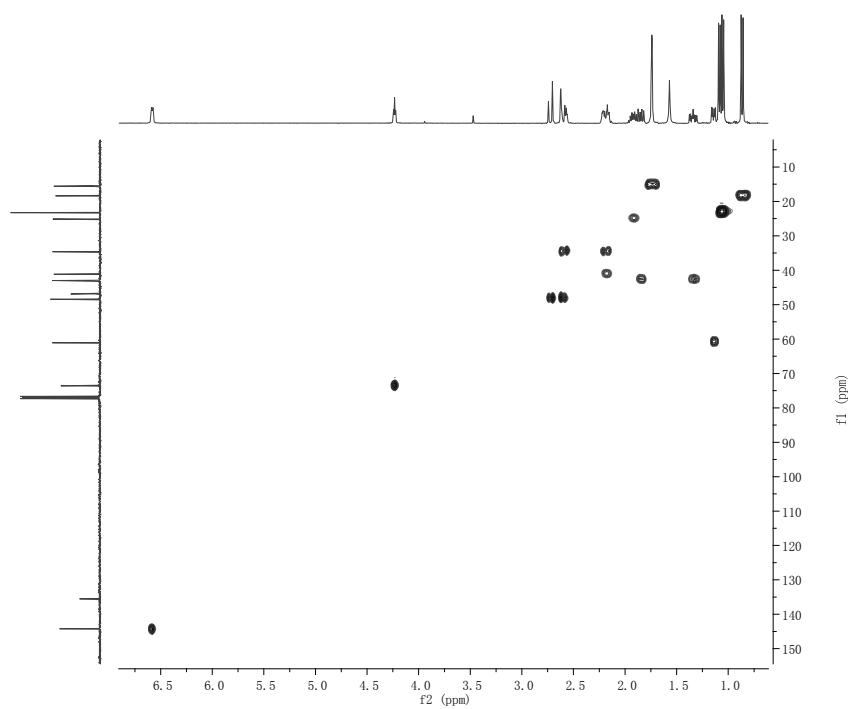

HSQC spectrum for 4-epi-2-hydroxyacorenone (**1**) in  $\text{CDCl}_3$

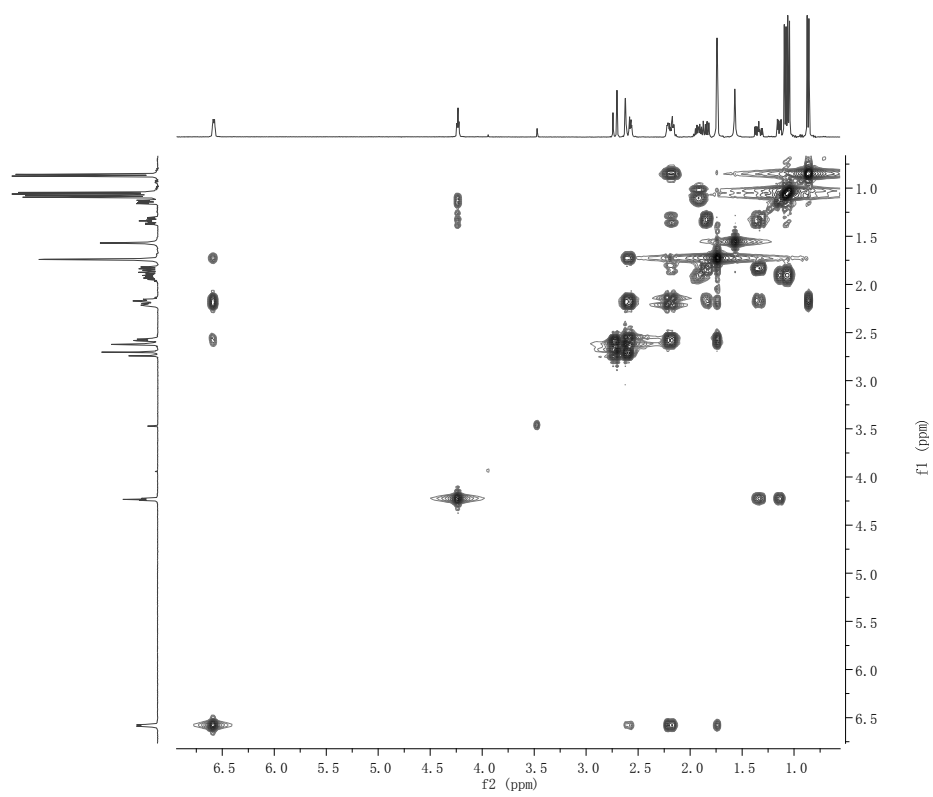

$^1\text{H}$ - $^1\text{H}$  COSY spectrum for 4-epi-2-hydroxyacorenone (**1**) in  $\text{CDCl}_3$

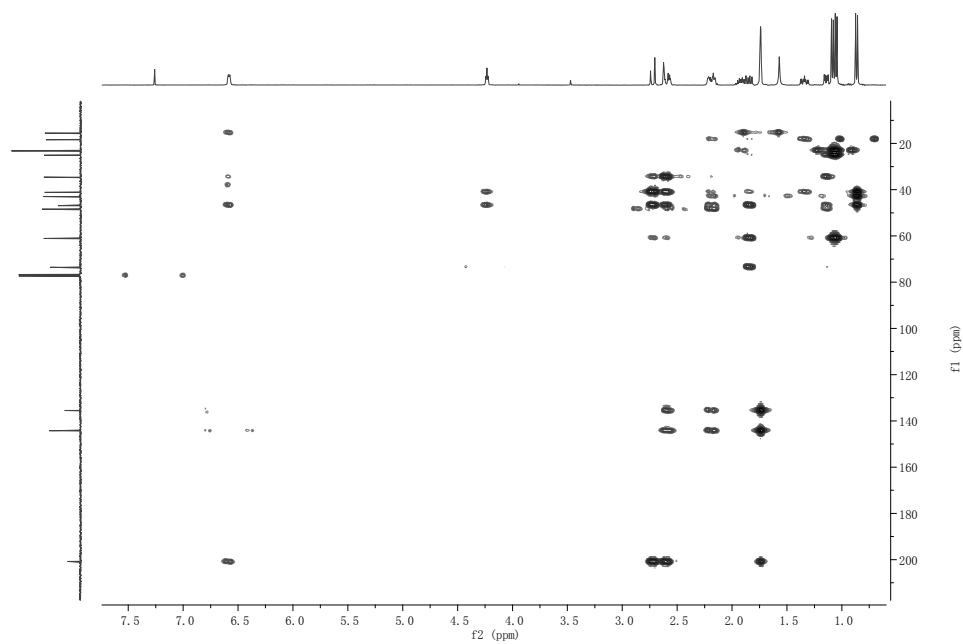

HMBC spectrum for 4-epi-2-hydroxyacorenone (**1**) in  $\text{CDCl}_3$

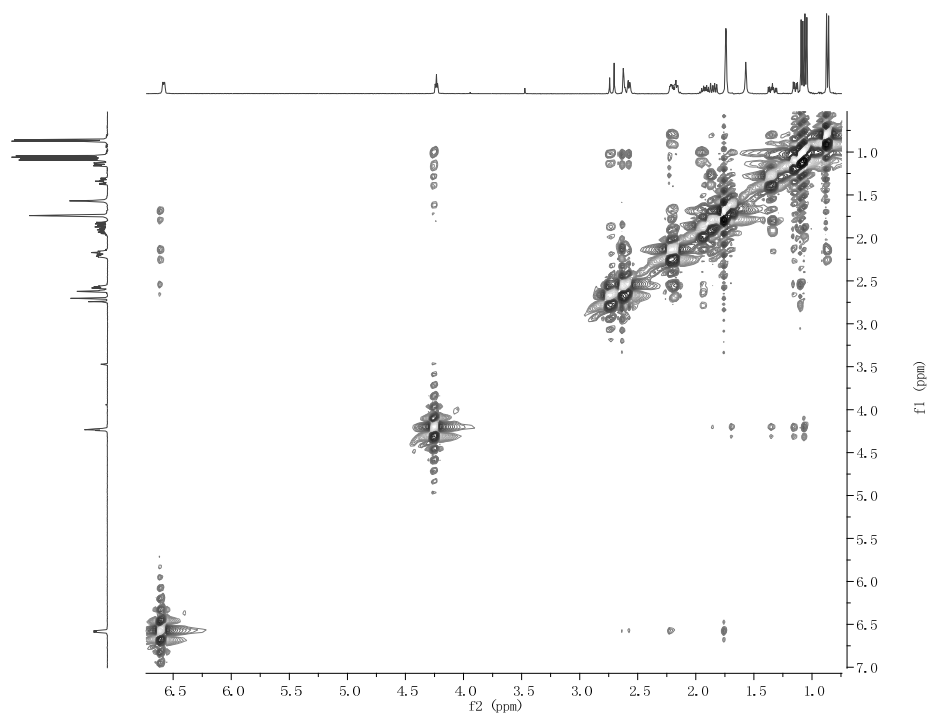

NOESY spectrum for 4-epi-2-hydroxyacorenone (**1**) in  $\text{CDCl}_3$

### 3 The 1D and 2D NMR spectra of 4-epi-2-acetoxycorenone (2)

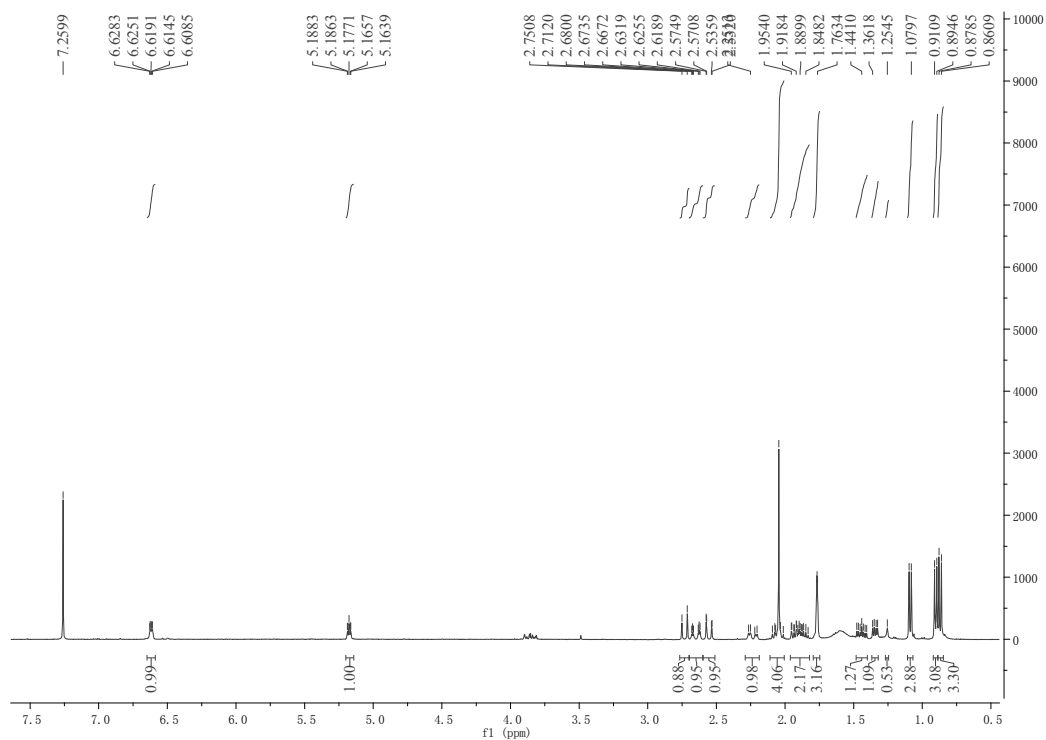

<sup>1</sup>H NMR spectrum for 4-epi-2-acetoxycorenone (**2**) in CDCl<sub>3</sub>

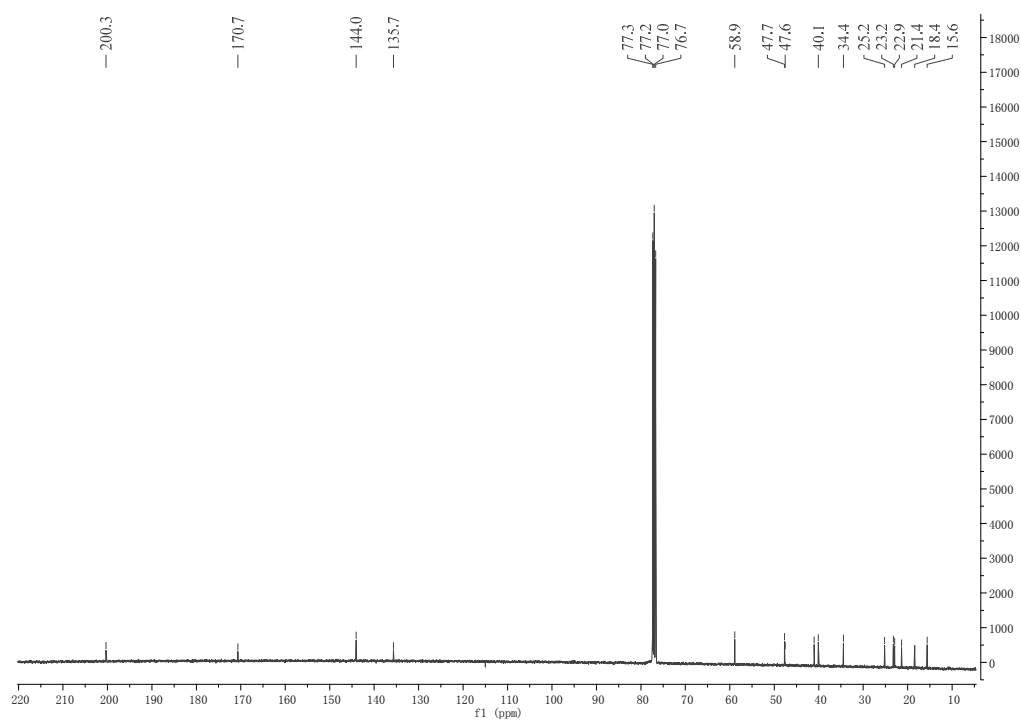

<sup>13</sup>C NMR spectrum for 4-epi-2-acetoxycorenone (**2**) in CDCl<sub>3</sub>

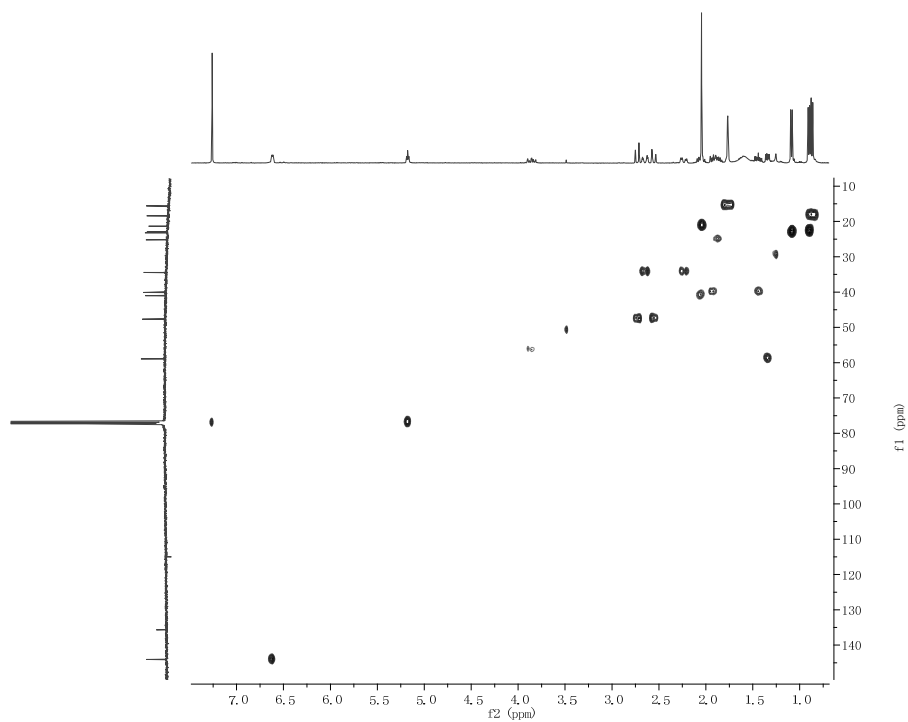

HSQC spectrum for 4-epi-2-acetoxycorenone (**2**) in  $\text{CDCl}_3$

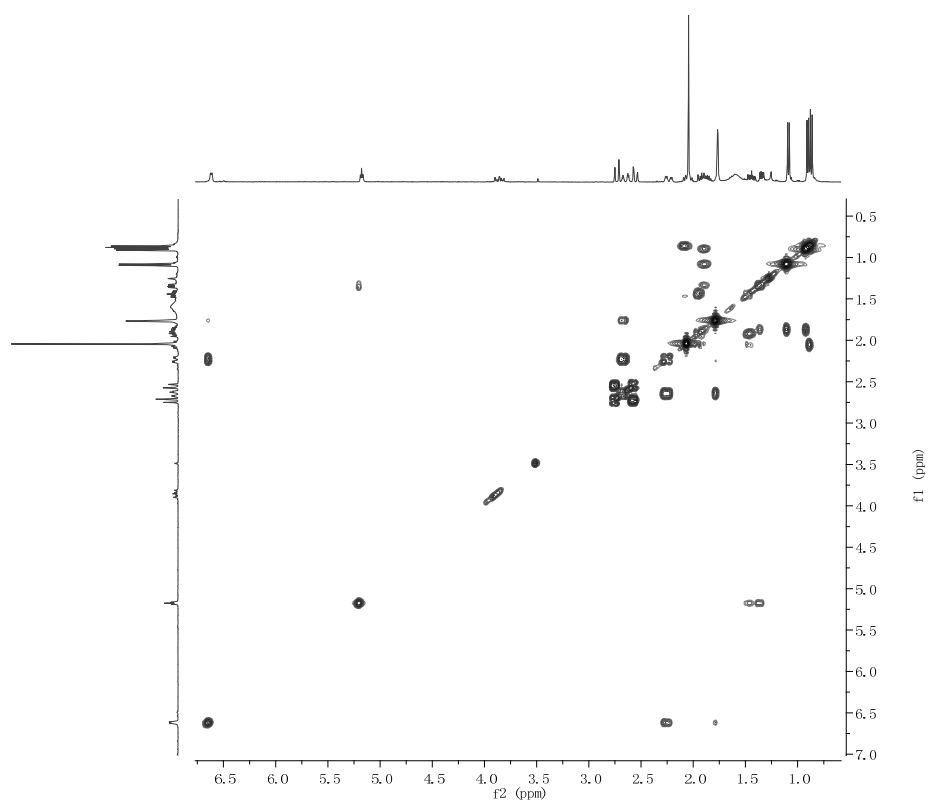

$^1\text{H}$ - $^1\text{H}$  COSY spectrum for 4-epi-2-acetoxycorenone (**2**) in  $\text{CDCl}_3$



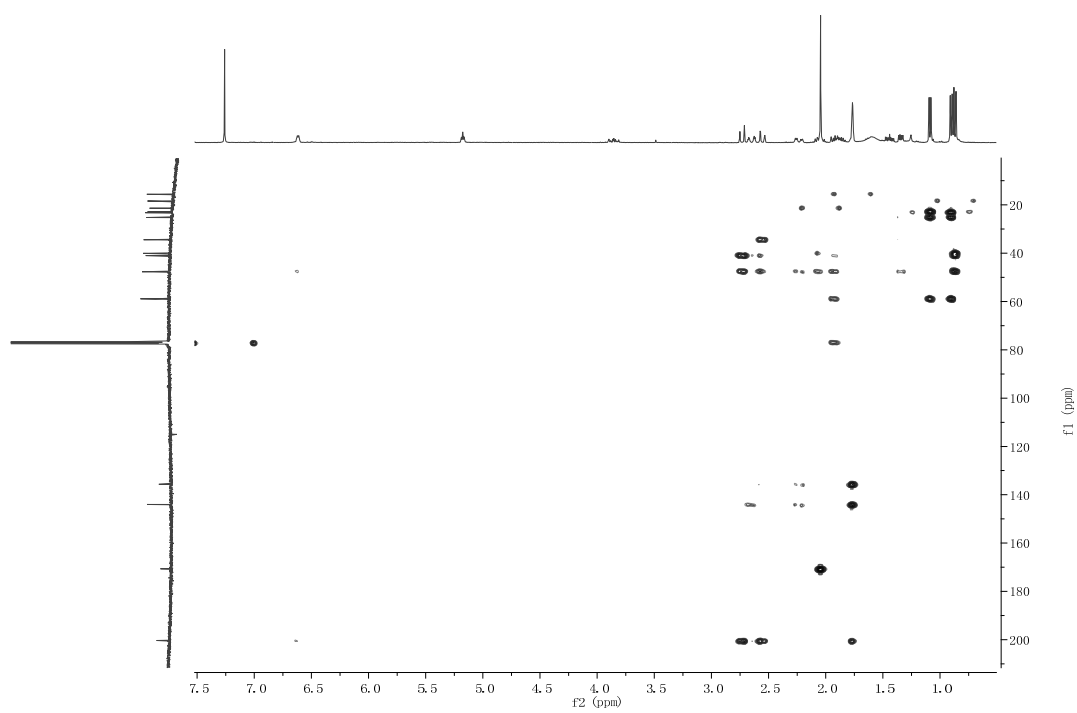

HMBC spectrum for 4-epi-2-acetoxycorenone (**2**) in  $\text{CDCl}_3$

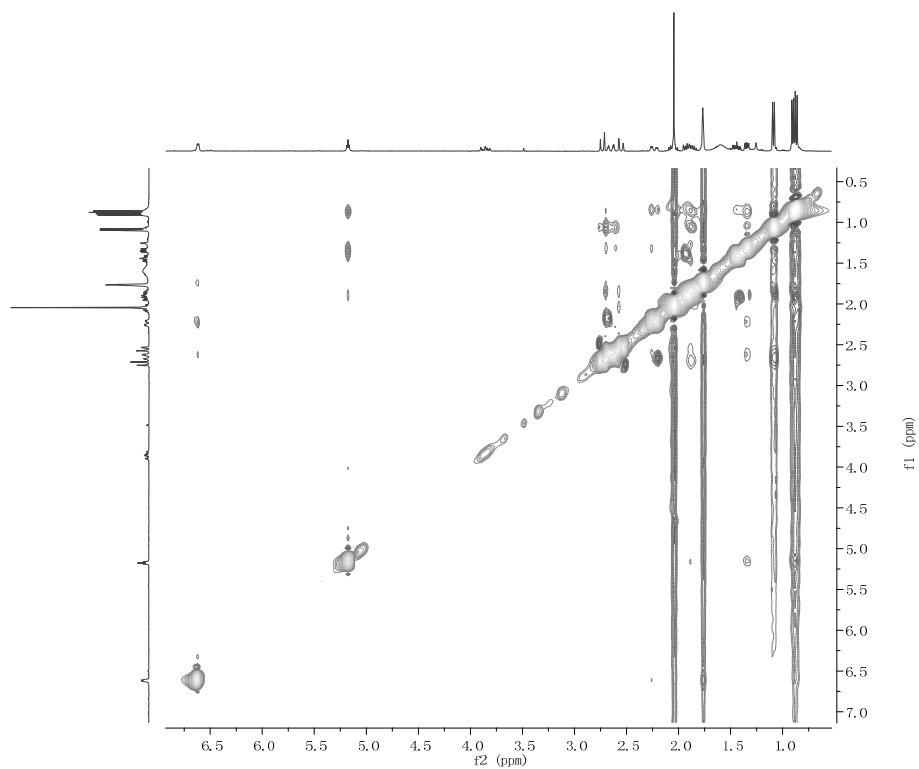

NOESY spectrum for 4-epi-2-acetoxycorenone (**2**) in  $\text{CDCl}_3$

#### 4 The 1D and 2D NMR spectra of acotatarone A (3)

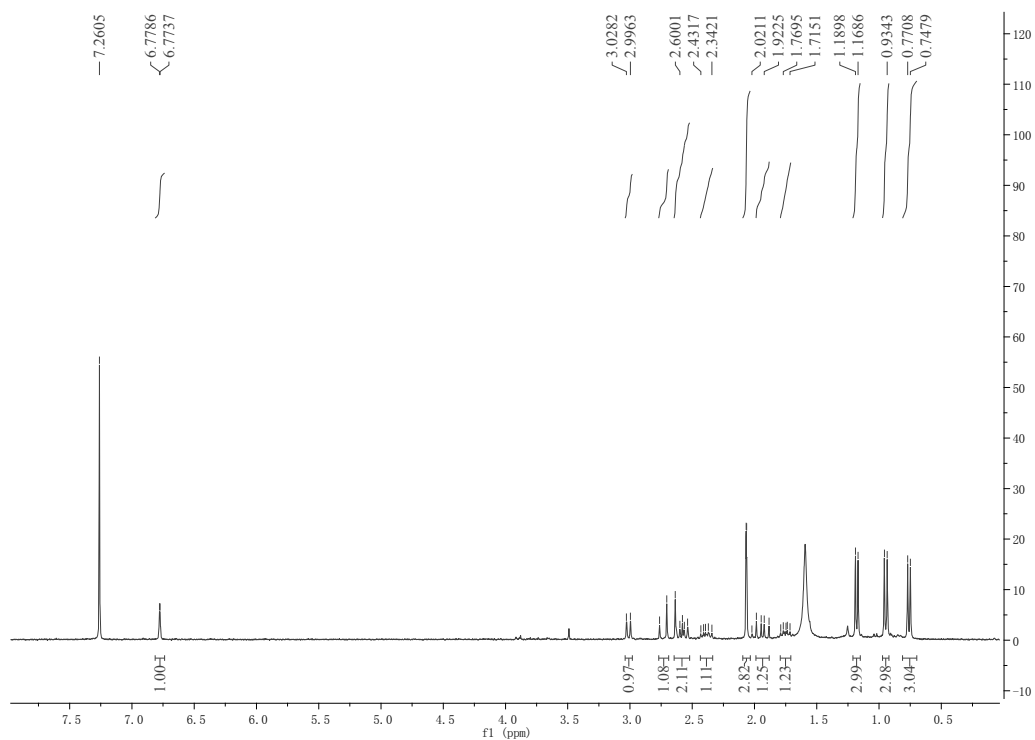

$^1\text{H}$  NMR spectrum for acotatarone A (3) in  $\text{CDCl}_3$

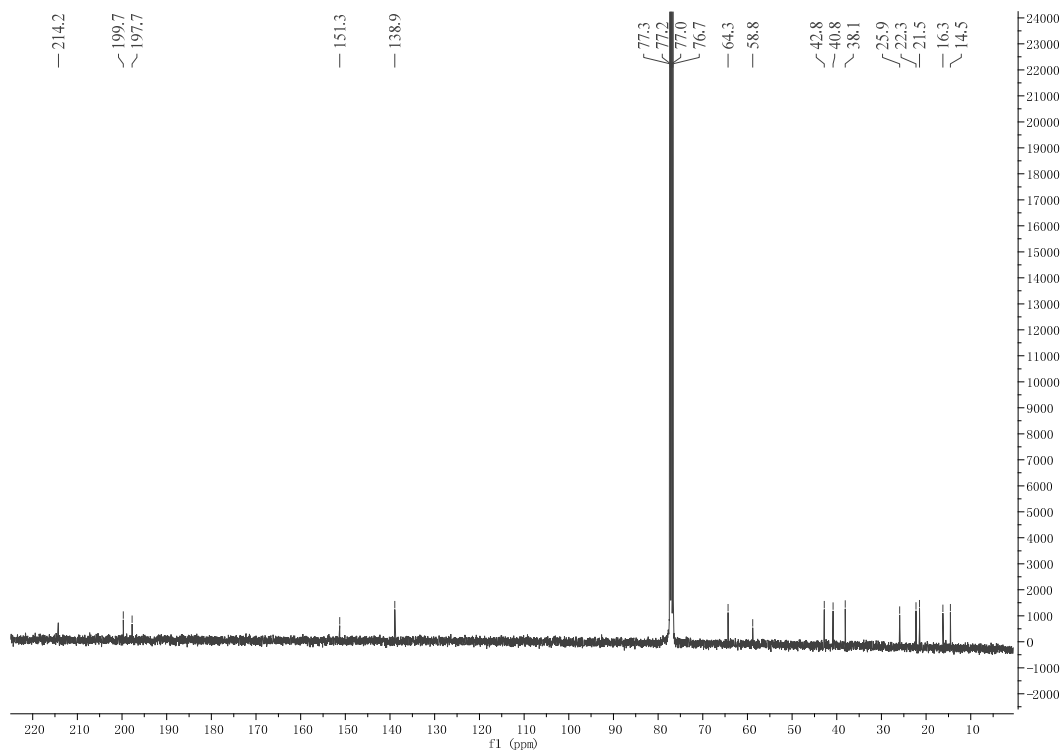

$^{13}\text{C}$  NMR spectrum for acotatarone A (3) in  $\text{CDCl}_3$

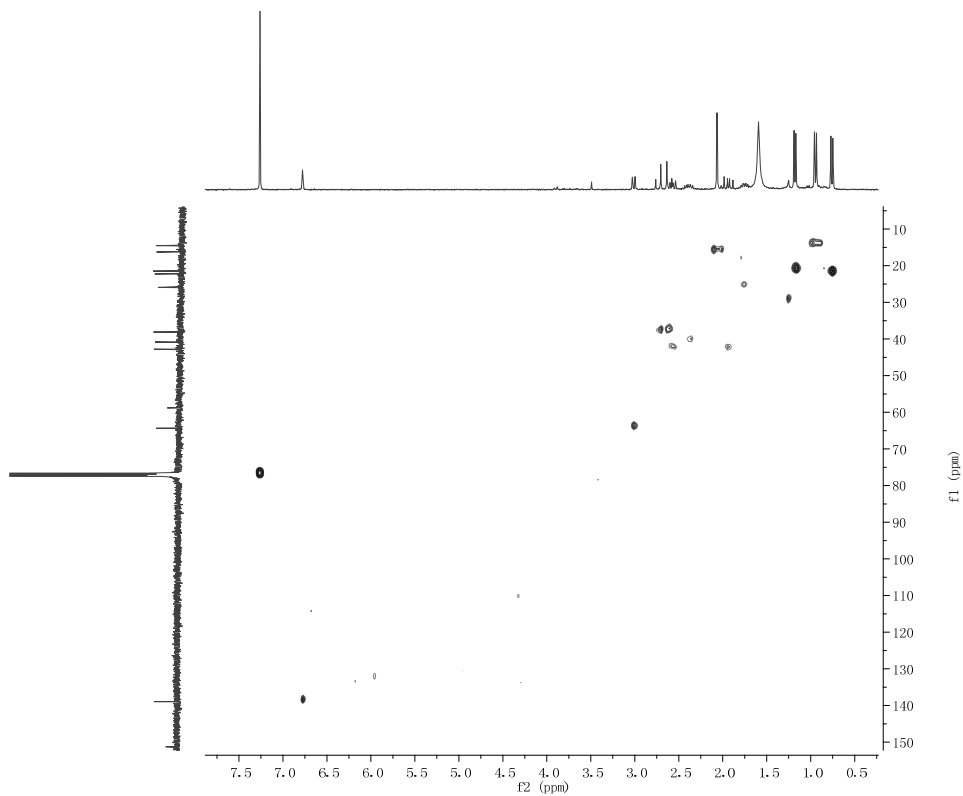

HSQC spectrum for acotatarone A (**3**) in  $\text{CDCl}_3$

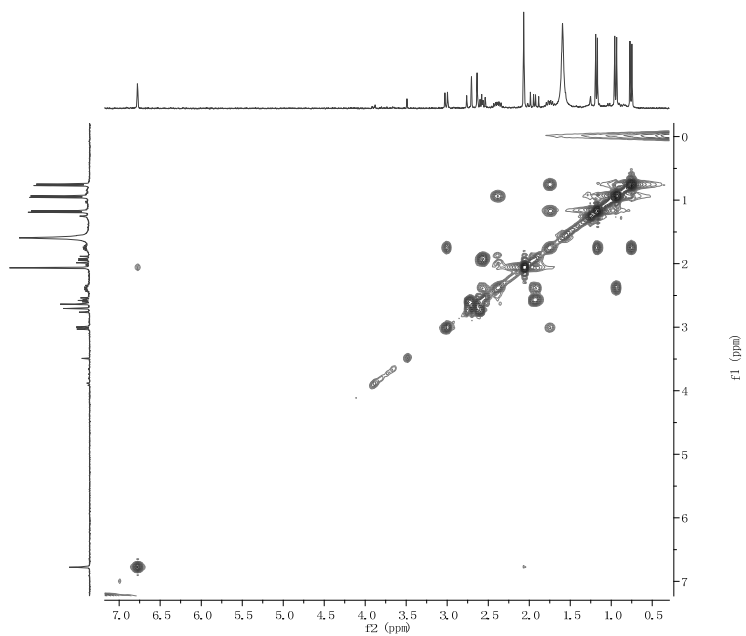

$^1\text{H}$ - $^1\text{H}$  COSY spectrum for acotatarone A (**3**) in  $\text{CDCl}_3$

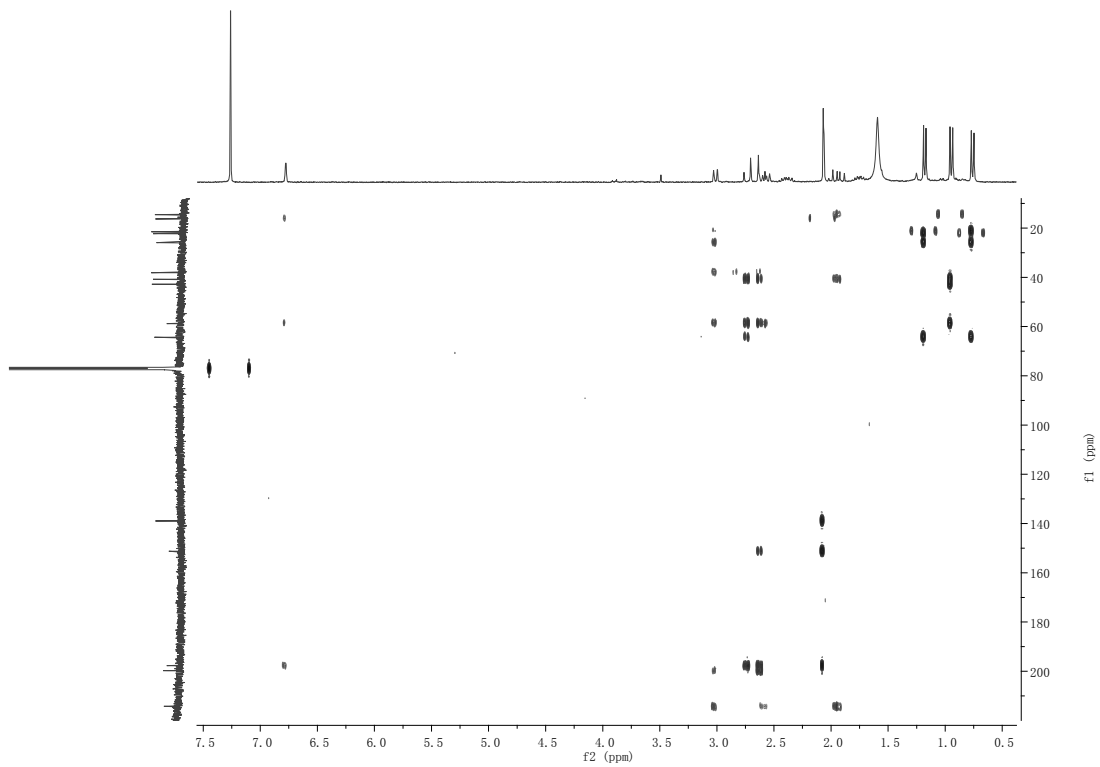

HMBC spectrum for acotatarone A (**3**) in  $\text{CDCl}_3$

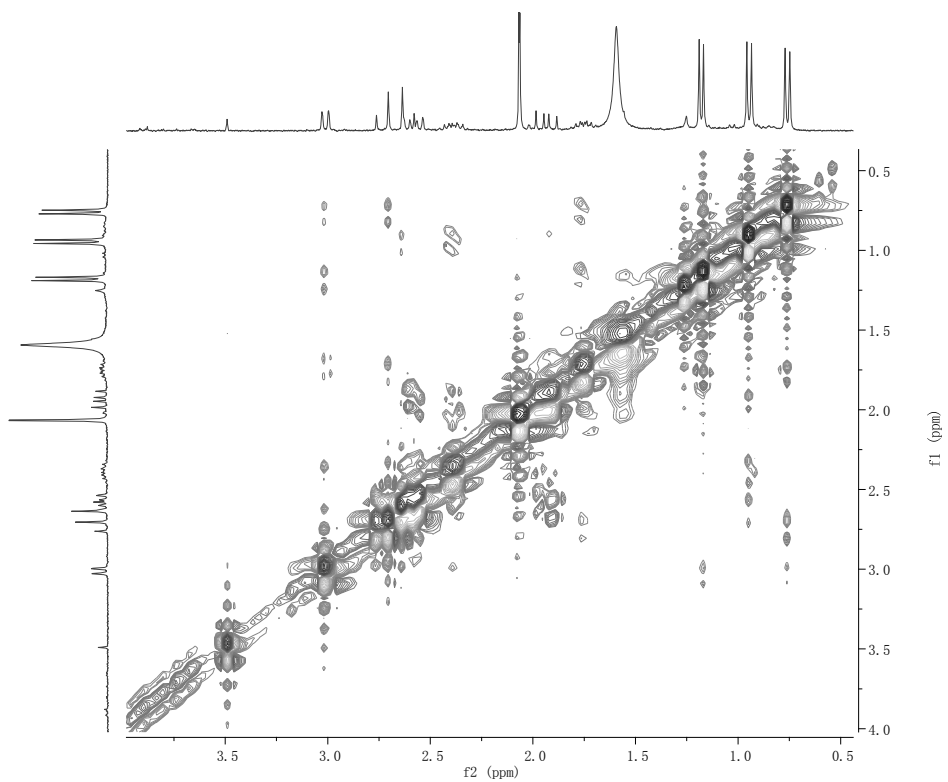

NOESY spectrum for acotatarone A (**3**) in  $\text{CDCl}_3$

## 5 The 1D and 2D NMR spectra of acotatarone B (4)

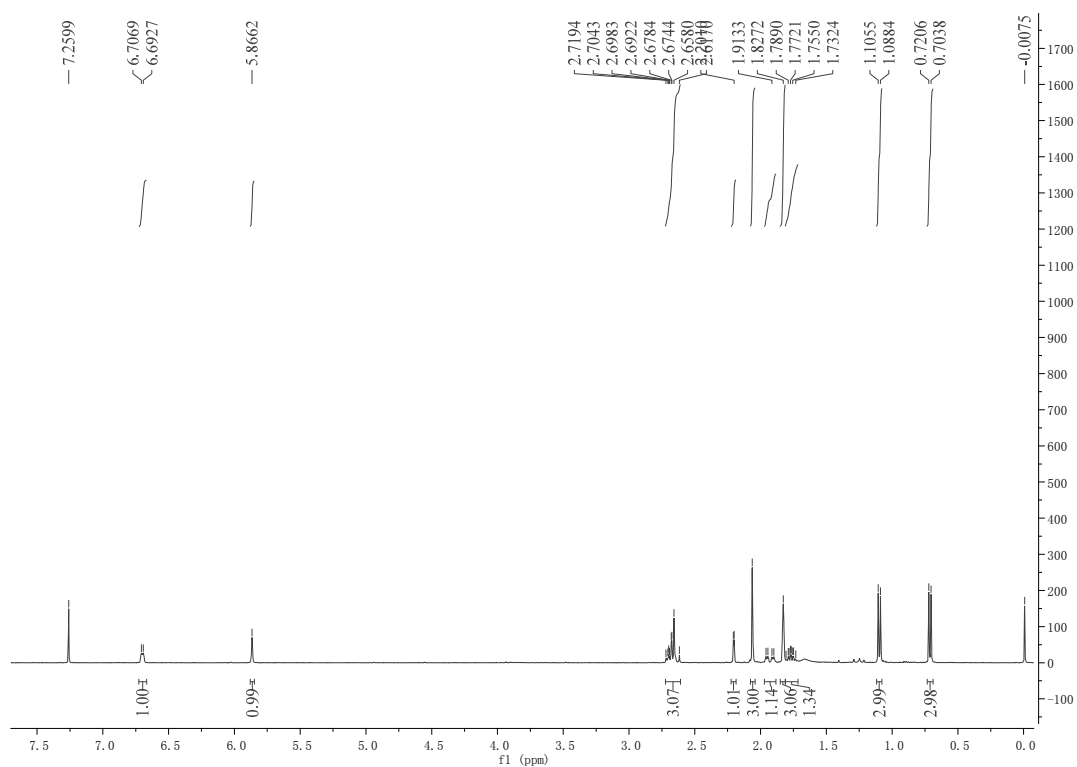

<sup>1</sup>H NMR spectrum for acotatarone B (4) in CDCl<sub>3</sub>

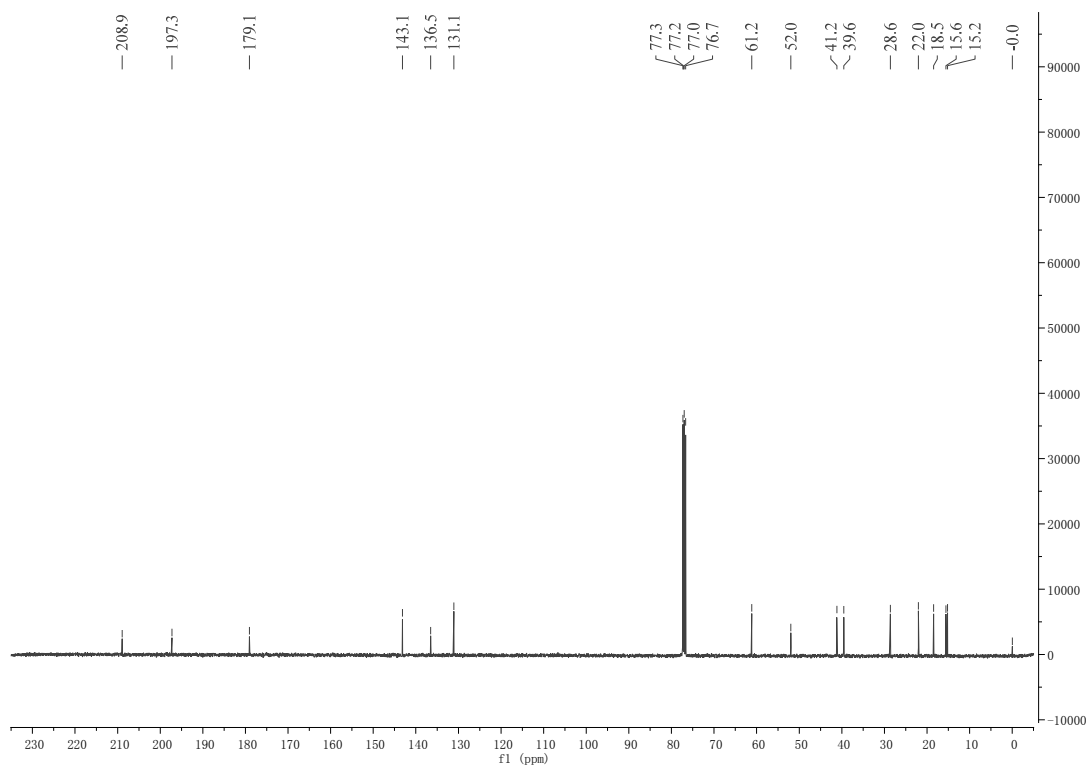

<sup>13</sup>C NMR spectrum for acotatarone B (4) in CDCl<sub>3</sub>

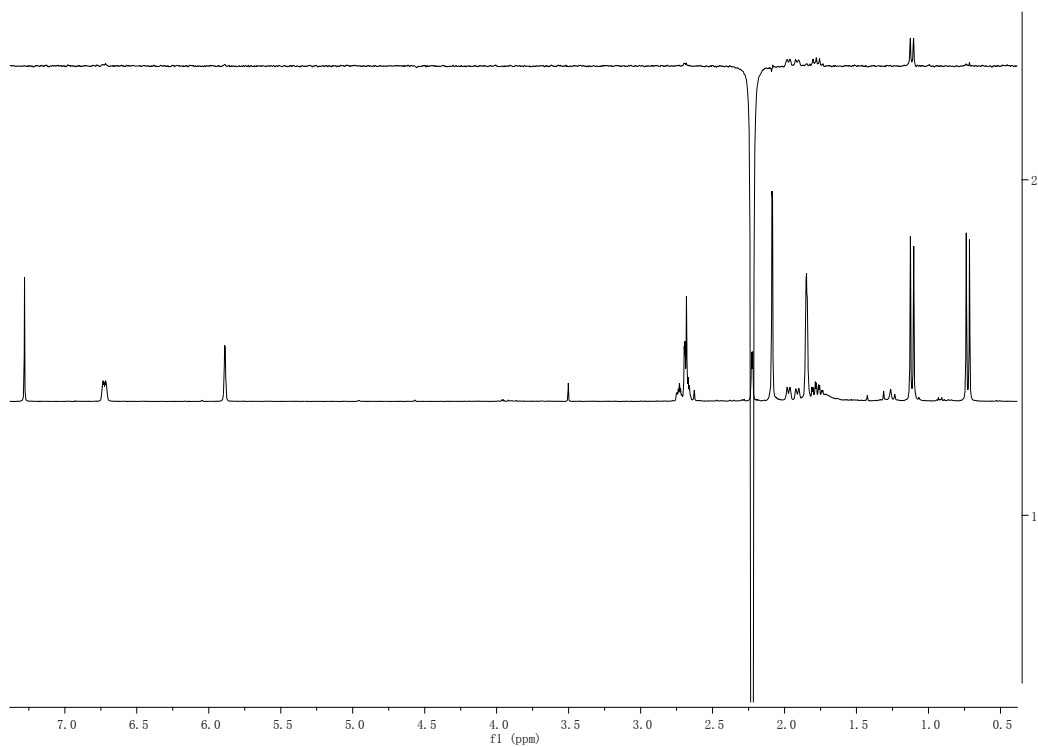

$^1\text{H}$  NMR and 1D-NOE spectra for acotatarone B (**4**) in  $\text{CDCl}_3$

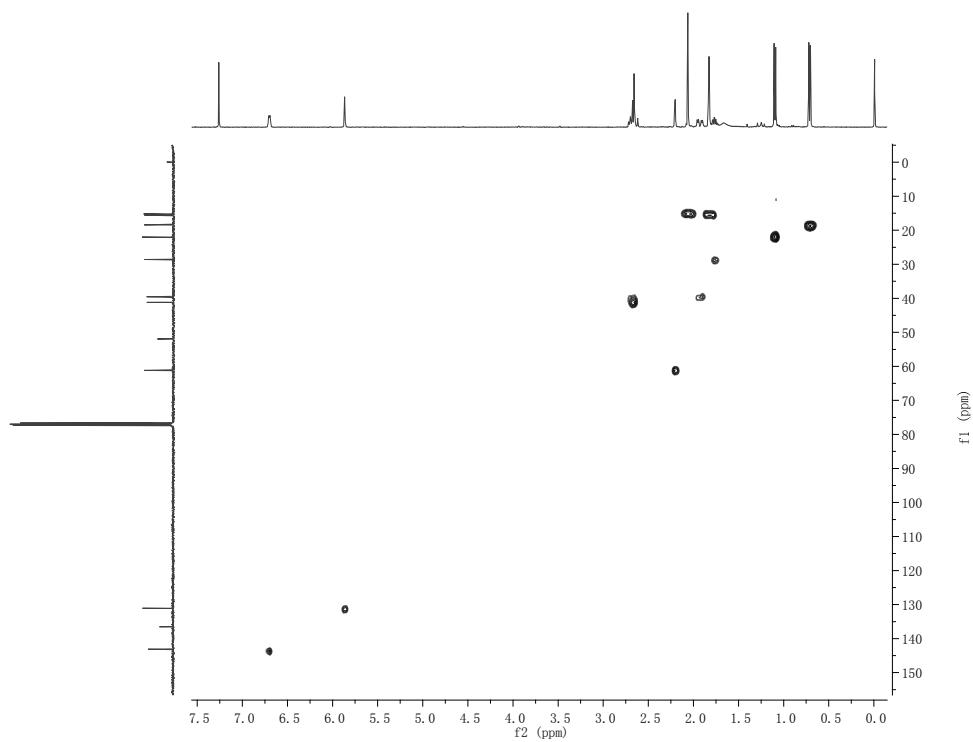

HSQC spectrum for acotatarone B (**4**) in  $\text{CDCl}_3$

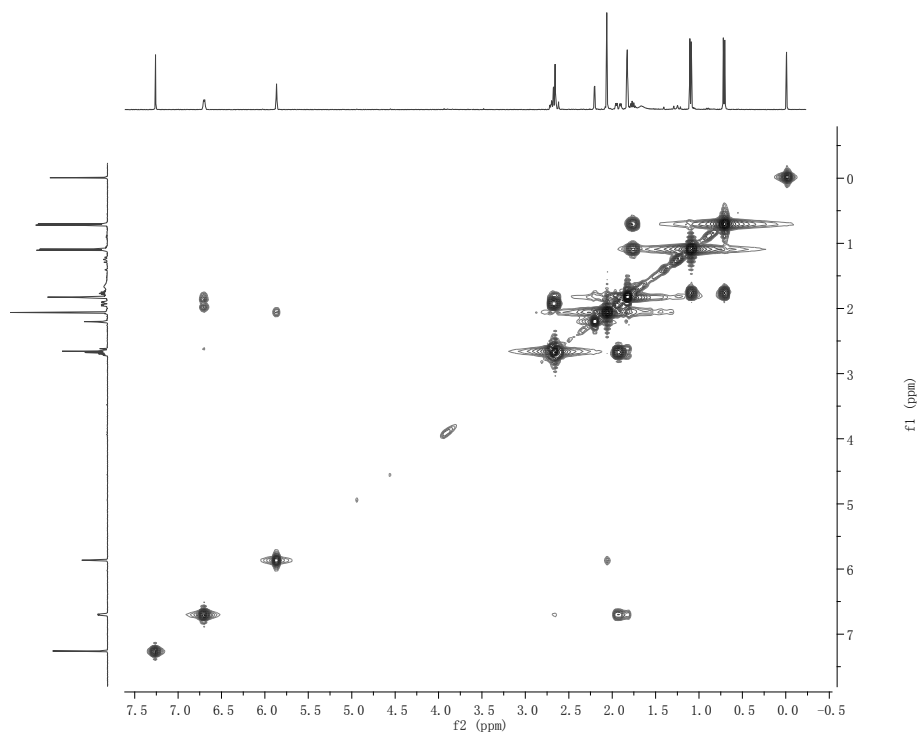

$^1\text{H}$ - $^1\text{H}$  COSY spectrum for acotatarone B (**4**) in  $\text{CDCl}_3$

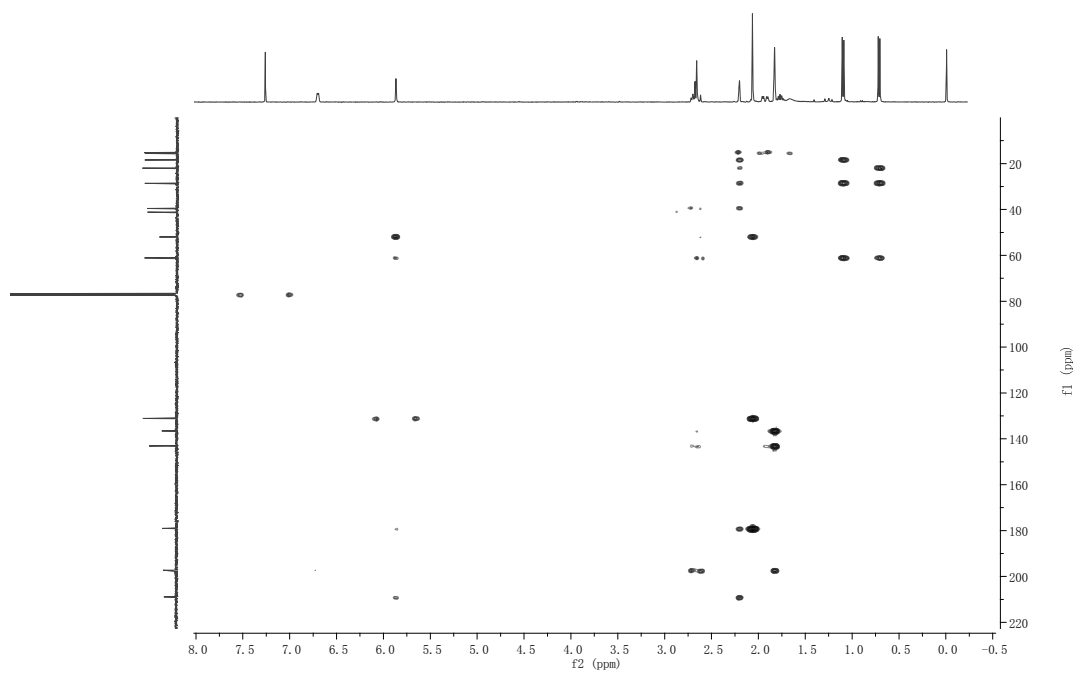

HMBC spectrum for acotatarone B (**4**) in  $\text{CDCl}_3$

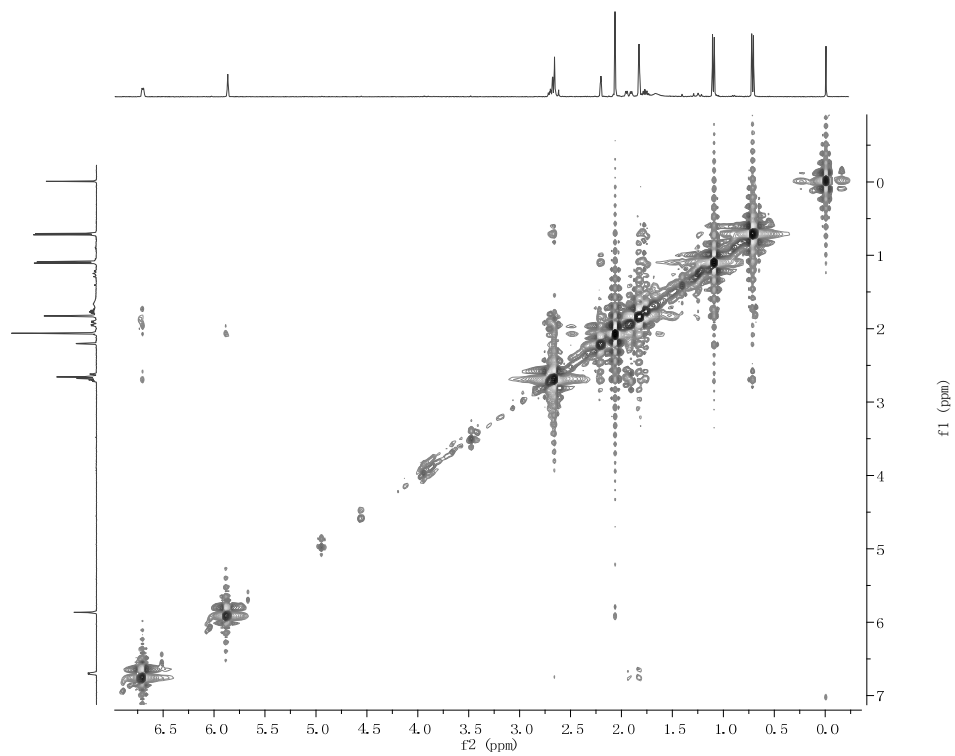

NOESY spectrum for acotatarone B (**4**) in  $\text{CDCl}_3$



## 6 The 1D and 2D NMR spectra of tatarinowin C (5)

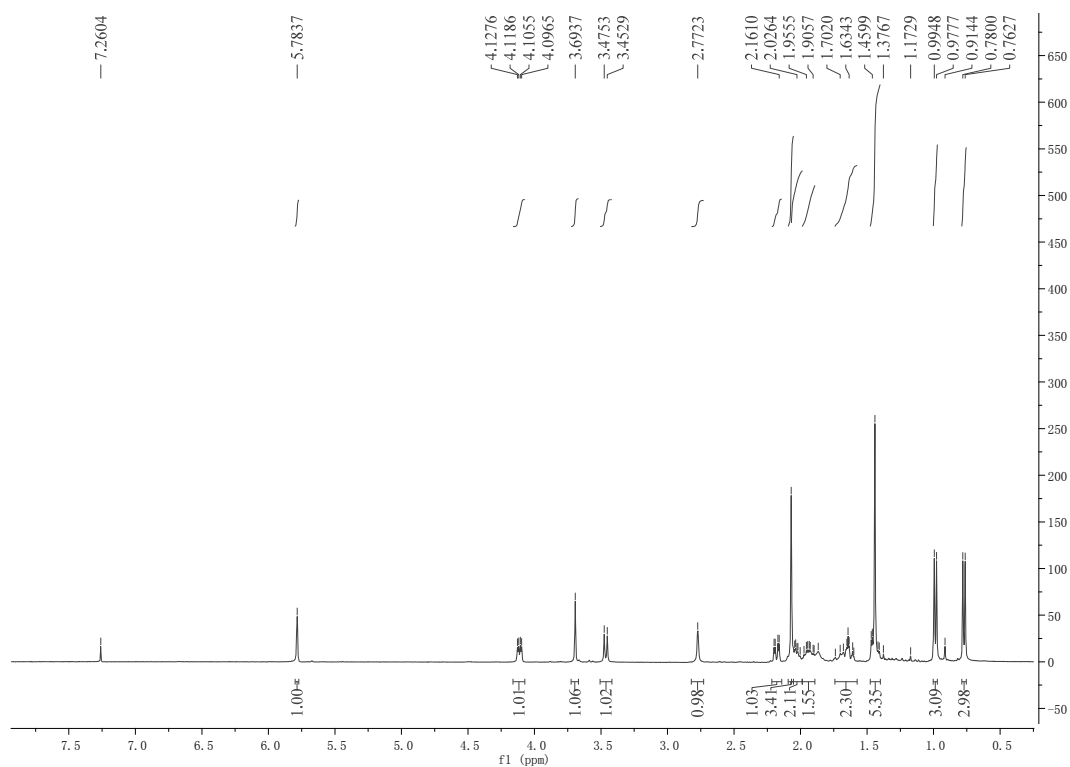

<sup>1</sup>H NMR spectrum for tatarinowin C (5) in CDCl<sub>3</sub>

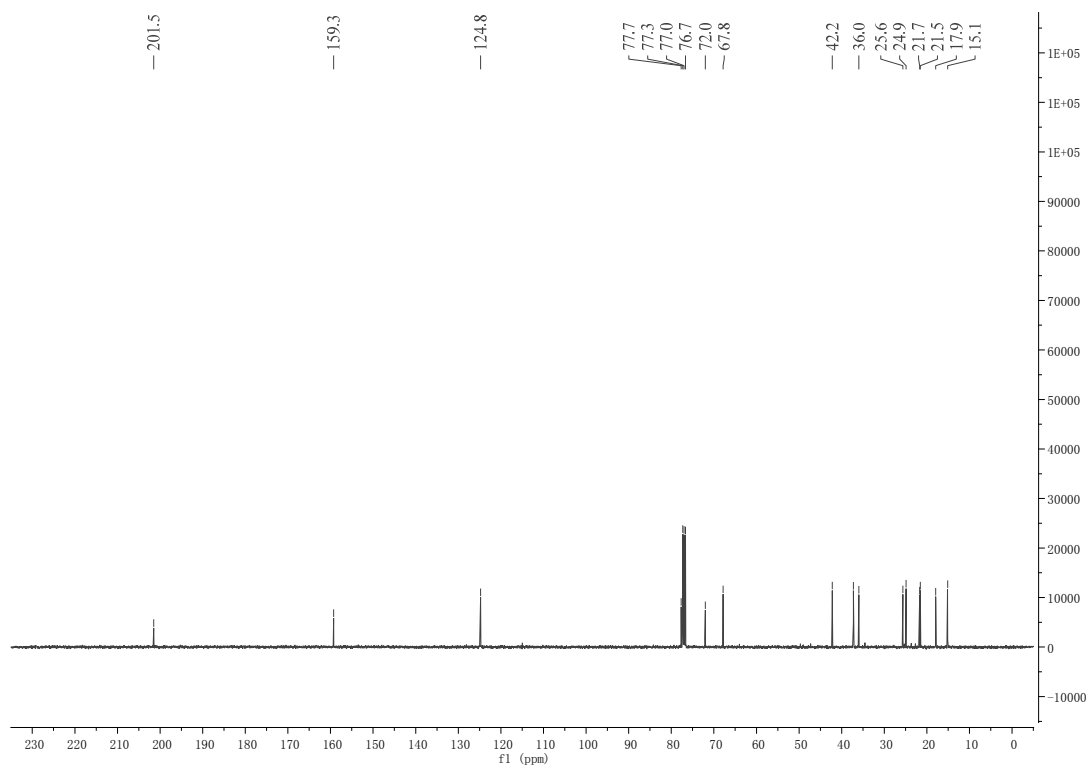

<sup>13</sup>C NMR spectrum for tatarinowin C (5) in CDCl<sub>3</sub>

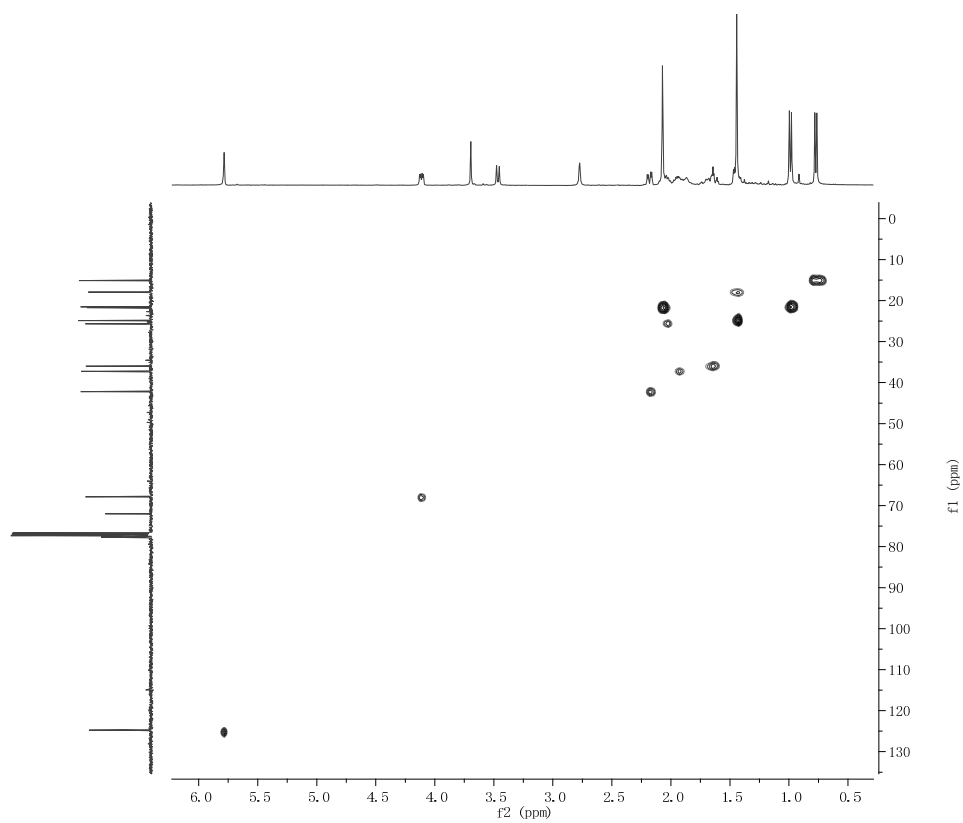

HSQC spectrum for tatarinowin C (**5**) in  $\text{CDCl}_3$

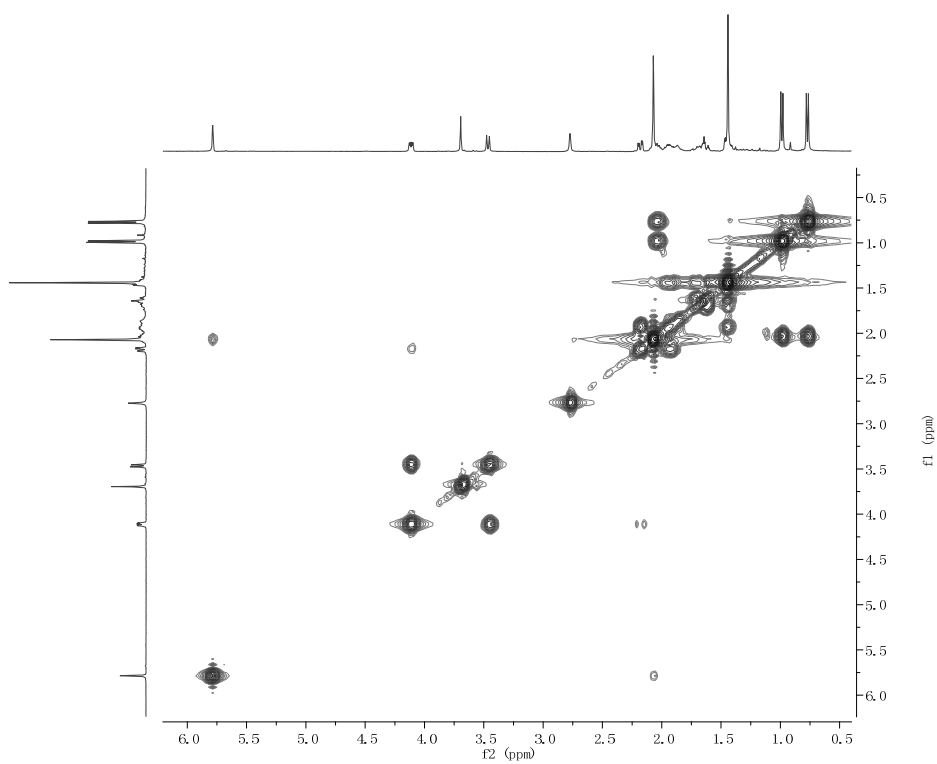

$^1\text{H}$ - $^1\text{H}$  COSY spectrum for tatarinowin C (**5**) in  $\text{CDCl}_3$

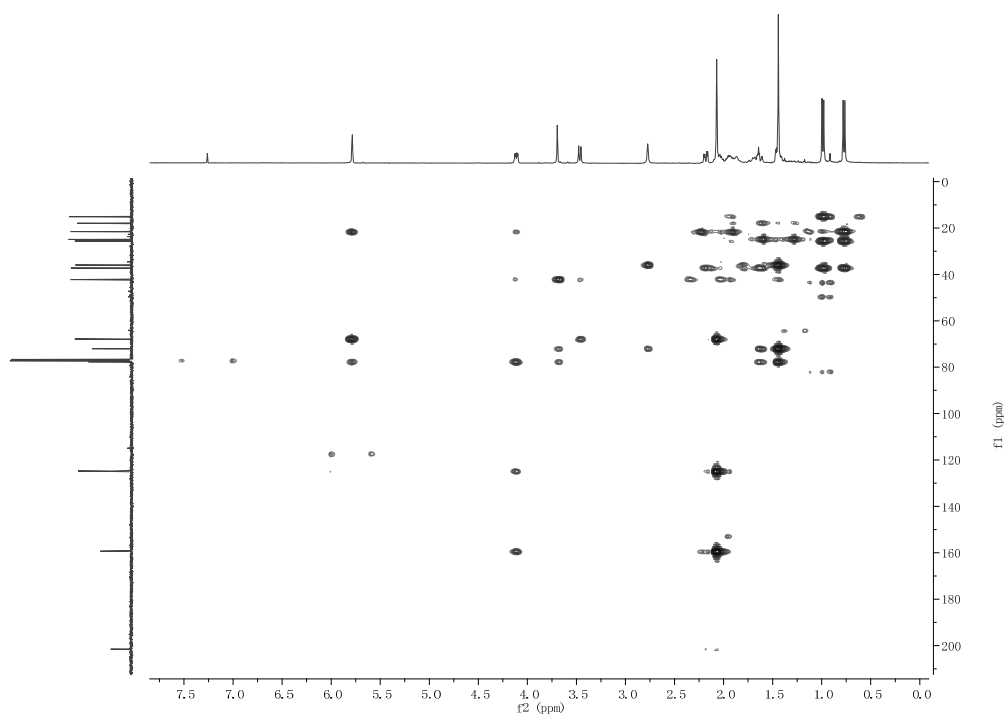

HMBC spectrum for tatarinowin C (**5**) in  $\text{CDCl}_3$

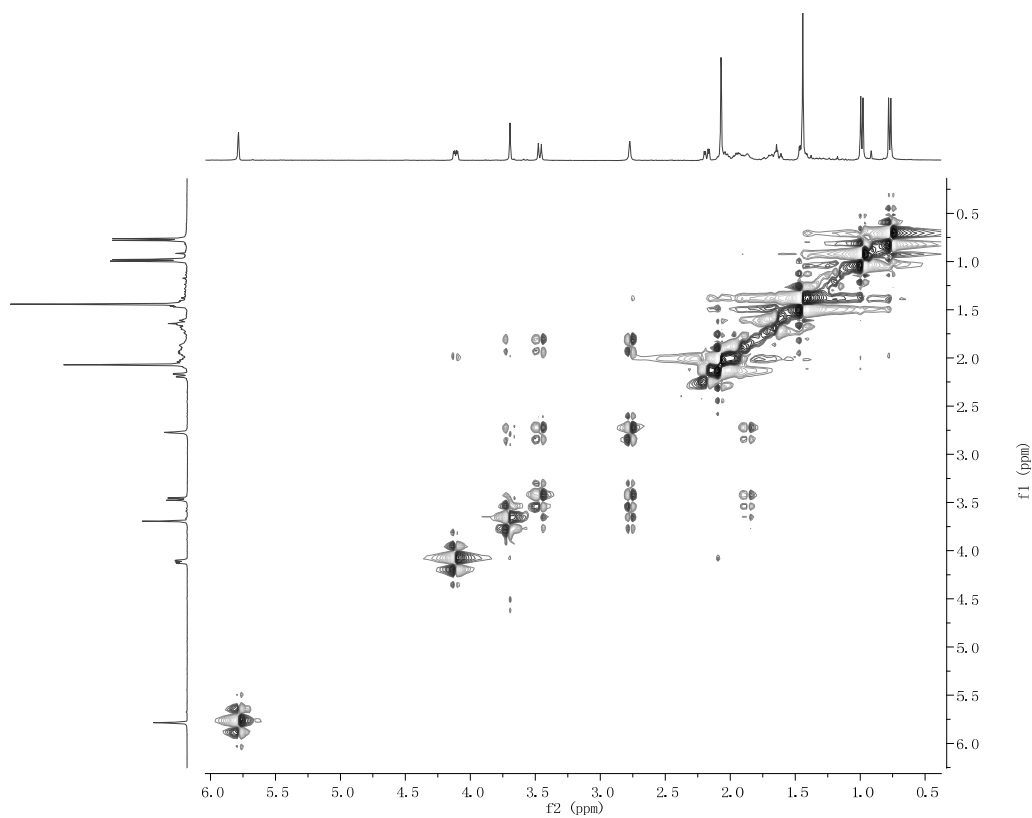

NOESY spectrum for tatarinowin C (**5**) in  $\text{CDCl}_3$

## 7 The 1D and 2D NMR spectra of acotatarone C (6)

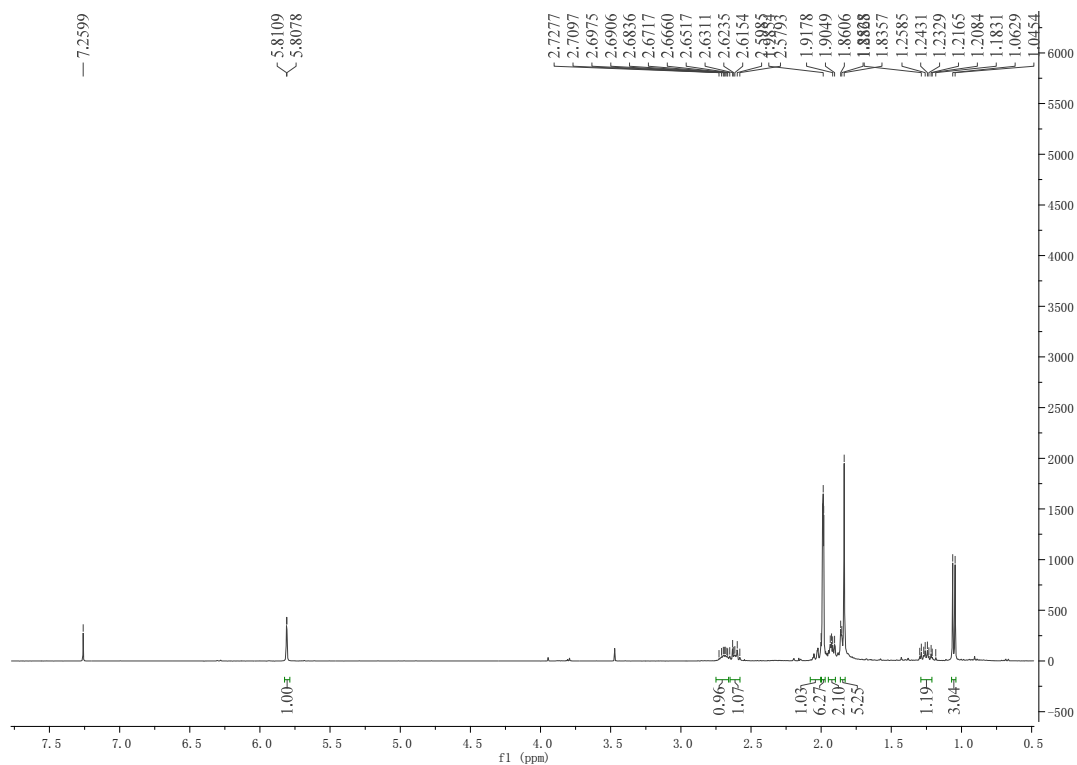

$^1\text{H}$  NMR spectrum for acotatarone C (6) in  $\text{CDCl}_3$

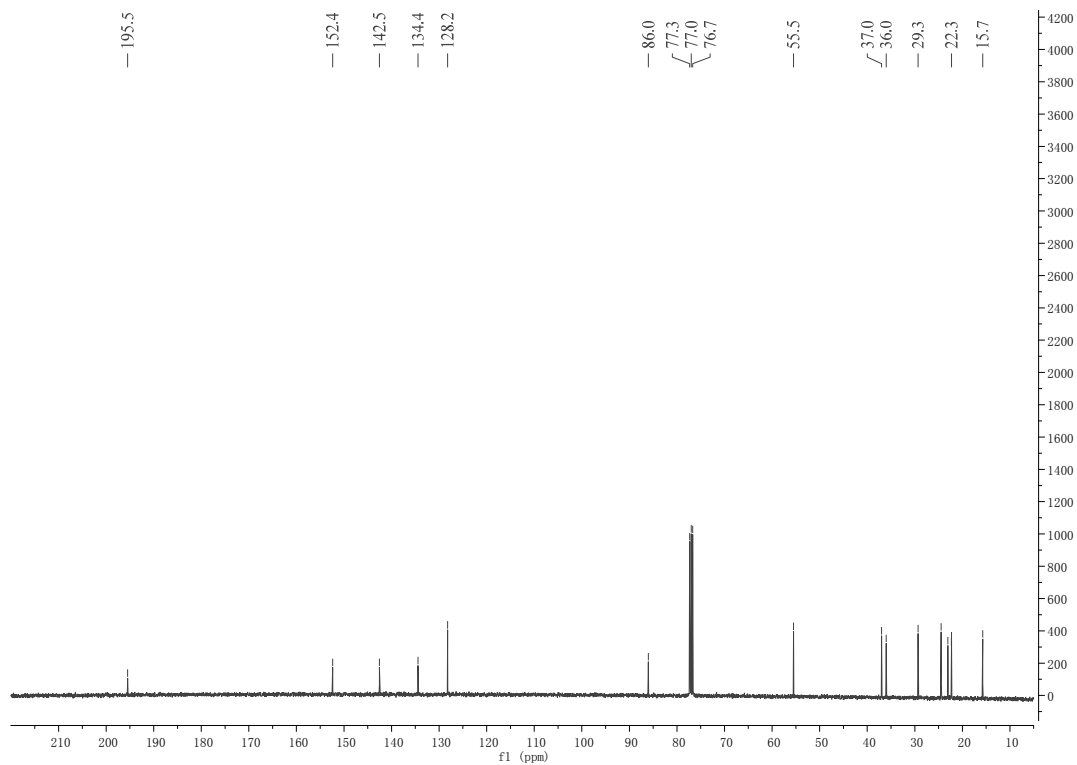

$^{13}\text{C}$  NMR spectrum for acotatarone C (6) in  $\text{CDCl}_3$

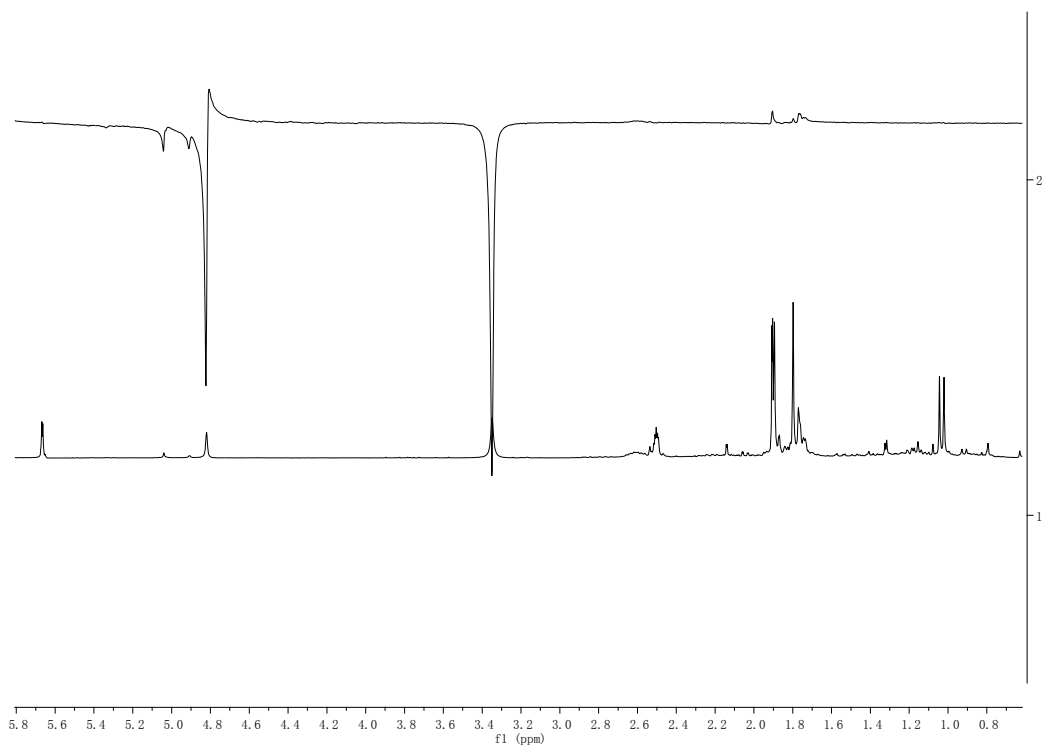

$^1\text{H}$  NMR and 1D-NOE spectra for acotatarone C (**6**) in  $\text{DMSO-}d_6$

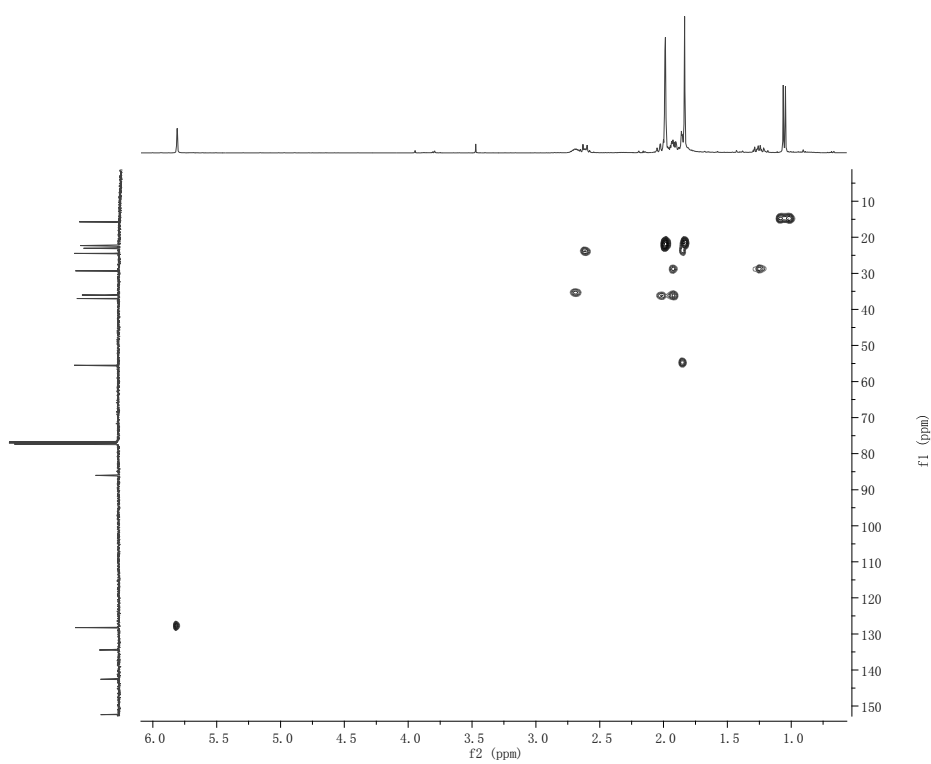

HSQC spectrum for acotatarone C (**6**) in  $\text{CDCl}_3$

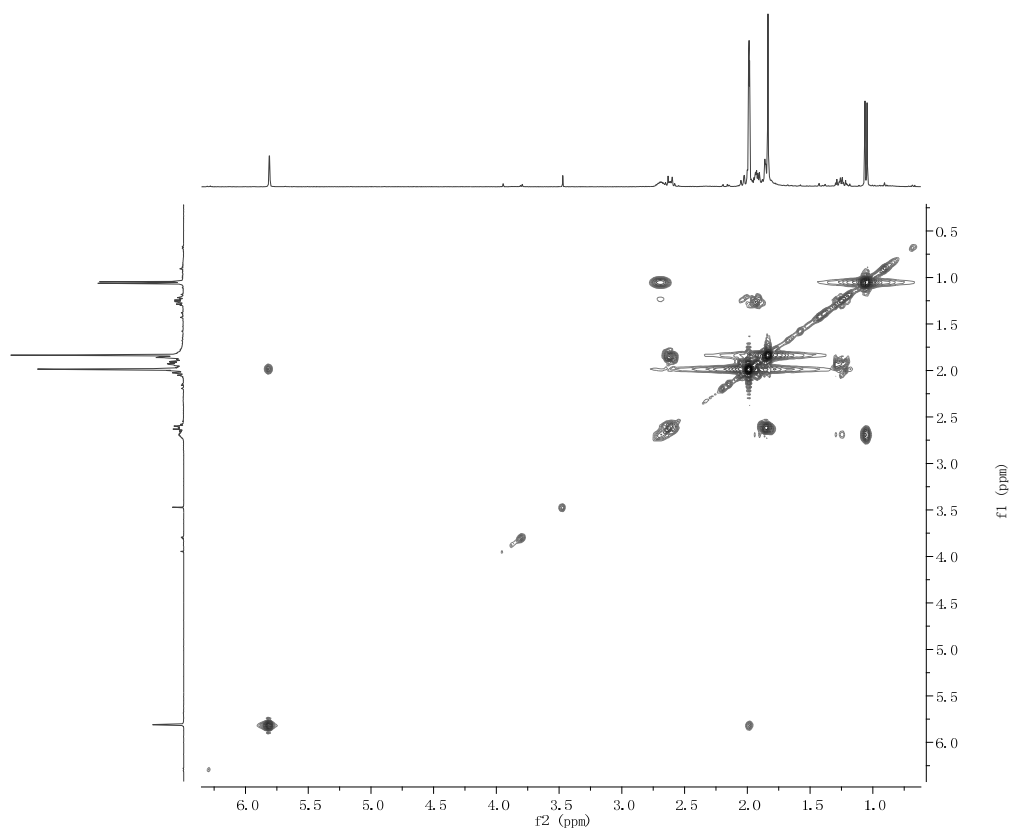

$^1\text{H}$ - $^1\text{H}$  COSY spectrum for acotatarone C (**6**) in  $\text{CDCl}_3$

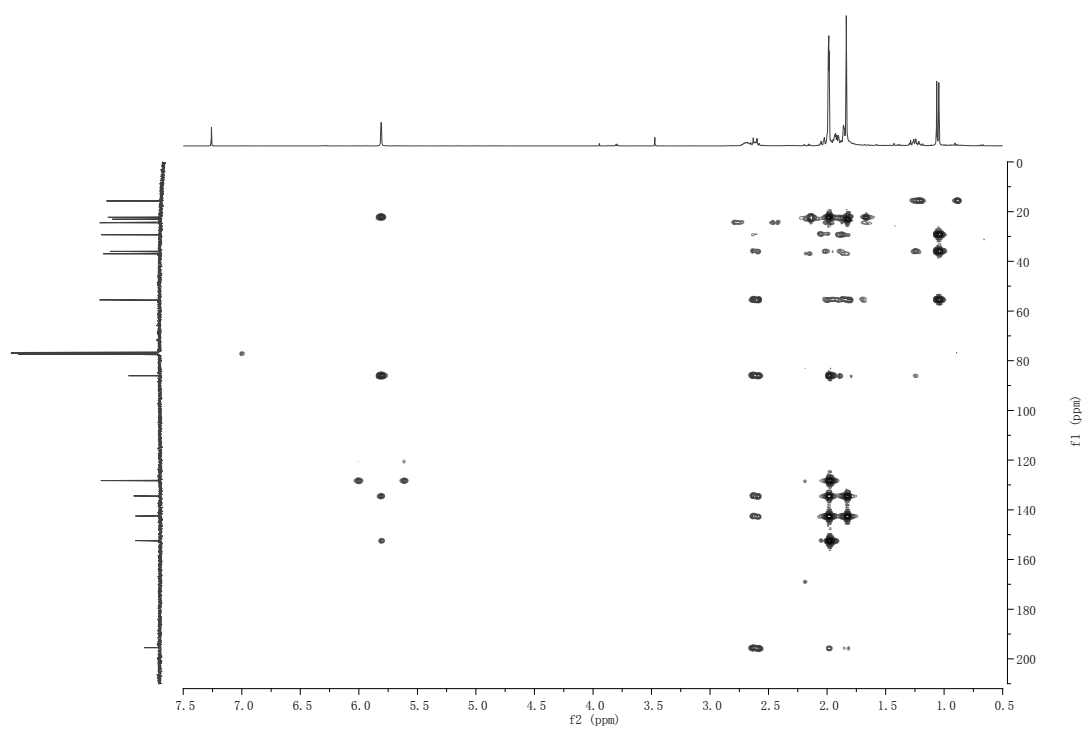

HMBC spectrum for acotatarone C (**6**) in  $\text{CDCl}_3$
